# Supplementary material for: Predictors for participation in DNA self-sampling of childhood cancer survivors in Switzerland
Source: bioRxiv or medRxiv preprint supplement (doi:10.1101/2021.05.25.21257796), 2021-05-27
Supplement: Supplementary file [file media-1.pdf]

1 **Predictors for participation in DNA self-sampling of childhood cancer survivors in**

2 **Switzerland**

3 Nicolas Waespe, MD,<sup>1,2,3</sup> Sven Strebelt, MSc Pharm,<sup>1,2,4</sup> Denis Marino MSc,<sup>2</sup> Veneranda

4 Mattiello, MD,<sup>2,5</sup> Fanny Muet, MSc,<sup>2</sup> Tiago Nava, MD,<sup>2,5</sup> Christina Schindera, MD,<sup>1,6</sup>

5 Fabien N. Belle, PhD,<sup>1,7</sup> Luzius Mader, PhD,<sup>1</sup> Adrian Spoerri, PhD, MPH,<sup>8</sup> Claudia E.

6 Kuehni, MD, MSc,<sup>1,9,\*</sup> Marc Ansari, MD.<sup>2,5,\*</sup>

7

8 **Supplementary Figure**

9

10 **Supplementary Figure 1.** Recruitment over time of Swiss childhood cancer survivors  
 11 invited for home germline DNA collection.

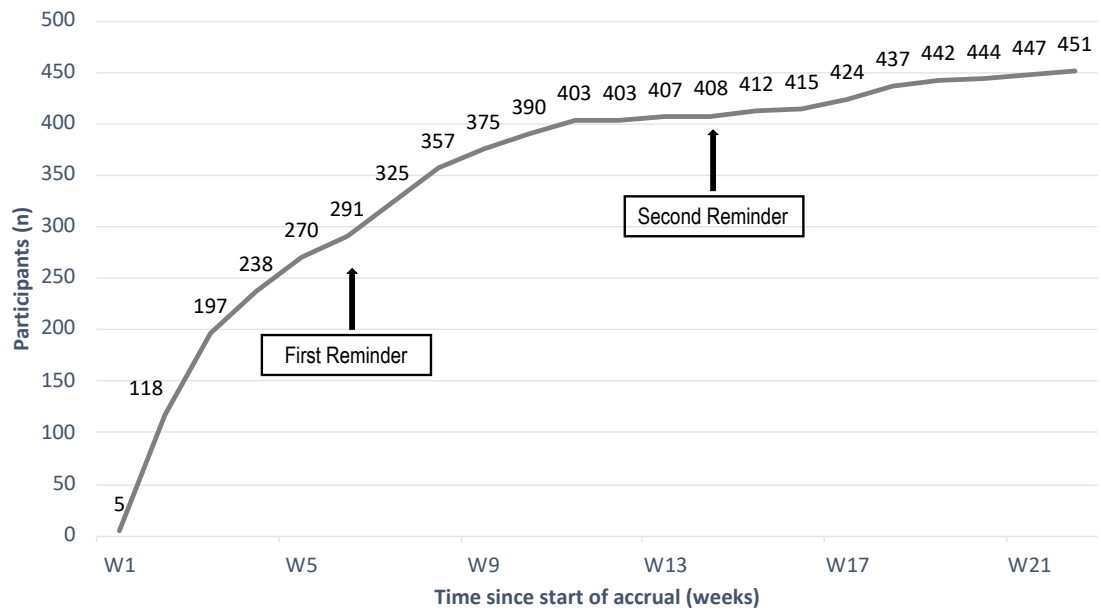

12

13 **Legend:** n, number; W, week.

14

15

16
